# Supplementary material for: Low-fouling SPR detection of lysozyme and its aggregates
Source: Royal Society of Chemistry journal article supplement (doi:10.1039/c4ay01237b), 2014-01-01
Supplement: c4ay01237b1.pdf [file c4ay01237b1.pdf]

## Supplementary material

### Low-fouling SPR detection of lysozyme and aggregates

Iuliana Mihai, AlisVezeanu, Cristina Polonschii, Sorin David, Szilveszter Gáspár, Bogdan Bucur, Christophe Blaszykowski, Sonia Sheikh, Michael Thompson, Alina Vasilescu

**Table S1.** Comparison of the analytical characteristics of lysozyme sensors

| Detection mode <sup>a</sup>                           | Detection limit (nM)   | Reference |
|-------------------------------------------------------|------------------------|-----------|
| SPR                                                   | 20                     | This work |
| SPR-previous work                                     | 70                     | [29]      |
| SPR, graphene coated interface                        | 0.5                    | [21]      |
| SPR, MIP                                              | 21                     | [54]      |
| SPR, competitive test, polyclonal antibody            | 0.01                   | [55]      |
| Fluorescence/graphene-based platform, amplification   | 5.6                    | [56]      |
| SWV/Au NP amplification                               | 2.0 x 10 <sup>-5</sup> | [57]      |
| SWV/Three-way junction DNA structure, Fc-tagged cDNA, | 0.2                    | [58]      |
| EIS, target-induced aptamer displacement              | 0.07                   | [19]      |
| EIS/MWCNT-SPE                                         | 862                    | [20]      |
| EIS/Chitosan-graphene oxide                           | 28.5                   | [59]      |
| EIS, aptamer, on recognition-induced charge switching | 14                     | [60]      |

<sup>a</sup> Abbreviations: SWV: Square Wave Voltammetry. EIS: Electrochemical Impedance Spectroscopy. MWCNT: Multi Wall Carbon Nanotubes. SPE: Screen-printed Electrode. NP: nanoparticle. MIP: Molecularly Imprinted Polymer

**Table S2** Properties of proteins investigated in the selectivity study

| Analyte              | Size (kDa) | Isoelectric point |
|----------------------|------------|-------------------|
| Lysozyme             | 14.3       | 11                |
| Myoglobin            | 17         | 7.2               |
| Cytochrome C         | 12         | 10.2              |
| Bovine Serum Albumin | 66         | 4.7               |
| Salmon Calcitonin    | 3.4        | 8.9               |

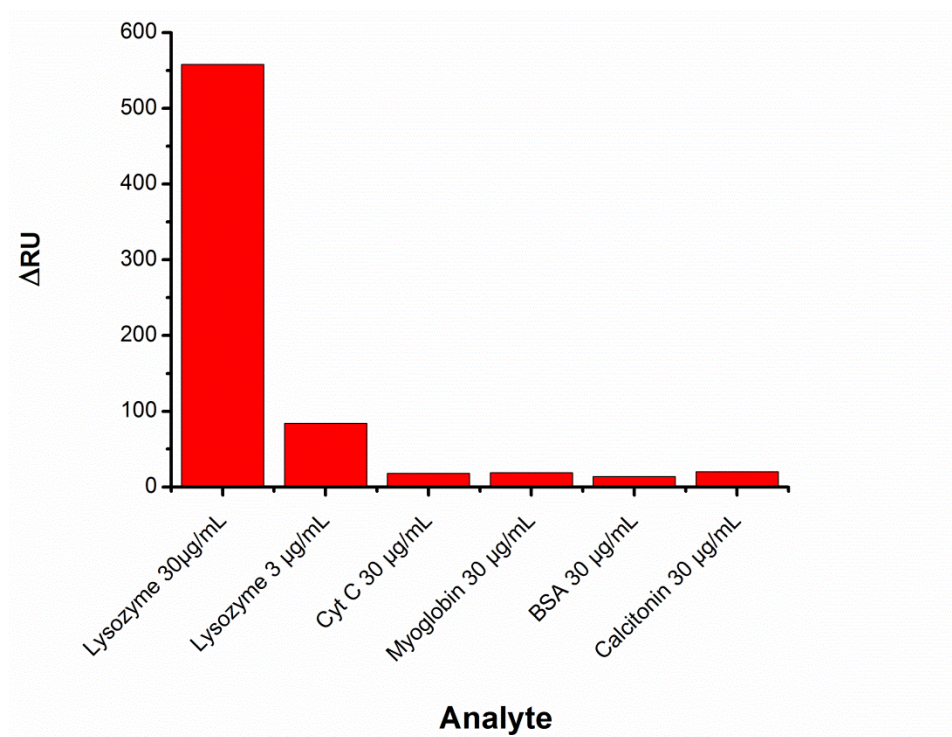

**Figure S1.** Net signal (calculated as  $\Delta RU = \Delta RU_{\text{aptamer channel}} - \Delta RU_{\text{reference channel}}$ ) recorded with the aptasensor for lysozyme (at 3  $\mu\text{g/mL}$  and 30  $\mu\text{g/mL}$ ) and for several proteins at 30  $\mu\text{g/mL}$ . Running buffer: 20 mM Tris-HCl pH 7.4 with 100 mM NaCl and 5 mM  $\text{MgCl}_2$ . The protein solutions were injected for 5 minutes at 100  $\mu\text{L/min}$ , followed by rinsing with buffer for 5 minutes at the same flow rate.
